# Supplementary material
Source: PubMed Central journal article supplement (PMC3038994)

- FFAT

+ FFAT

Calreticulin

Flag-VAP

Calreticulin

Flag-VAP

VAPA WT

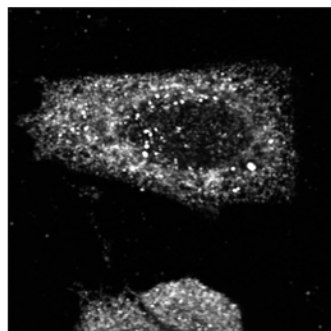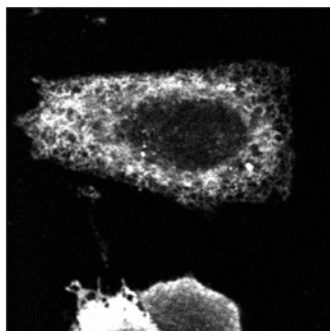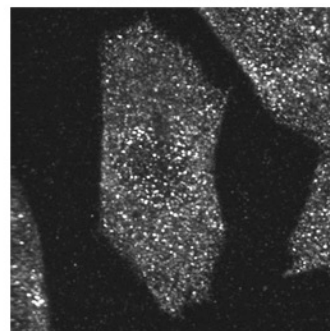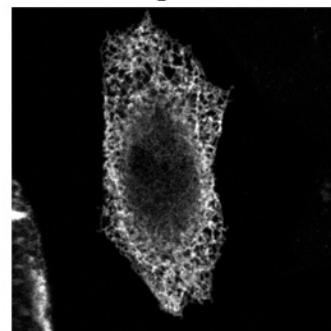

VAPA P56S

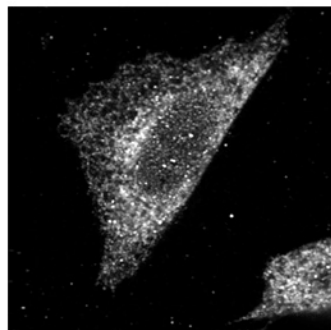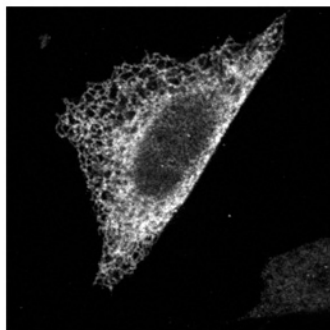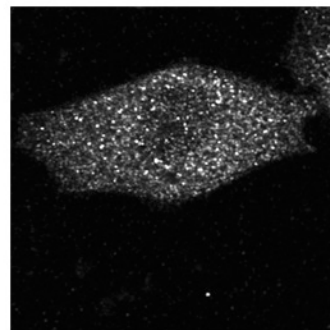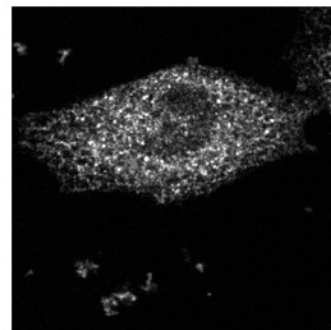

VAPB WT

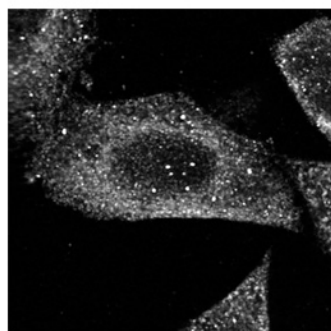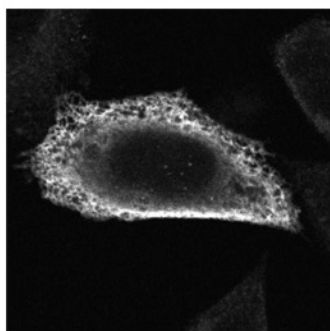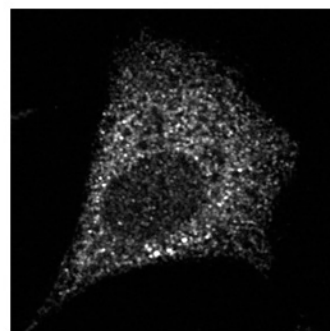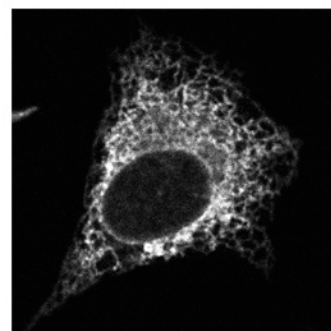

VAPB P56S

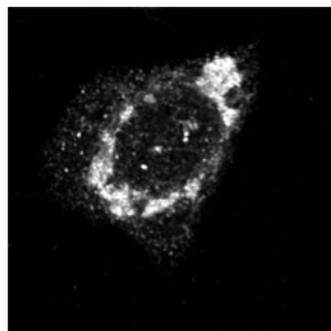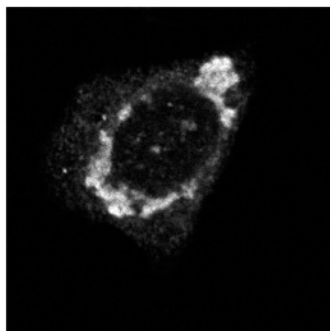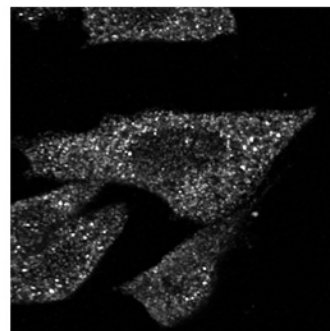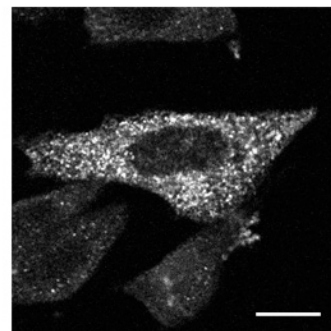

Supplement: NIHMS782-supplement-supp_material1.pdf [file NIHMS782-supplement-supp_material1.pdf]

VAPA-WT

VAPA-P56S

VAPB-WT

VAPB-P56S

- FFAT

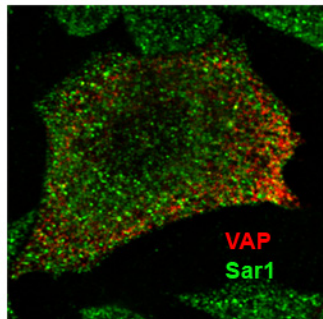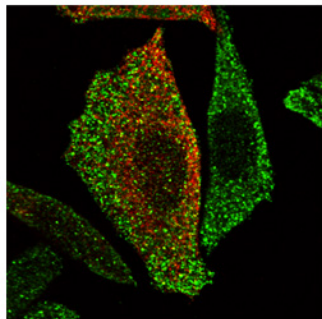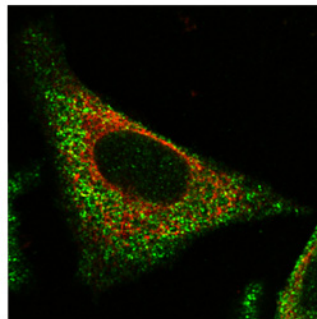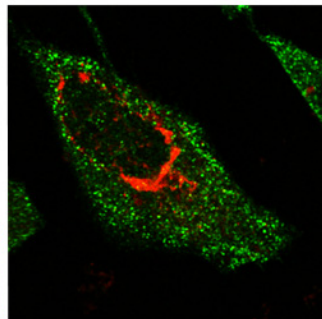

+ FFAT

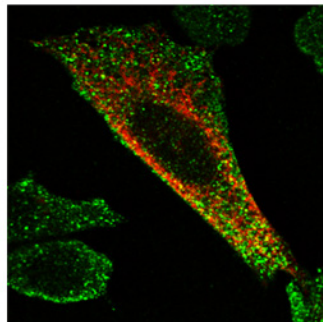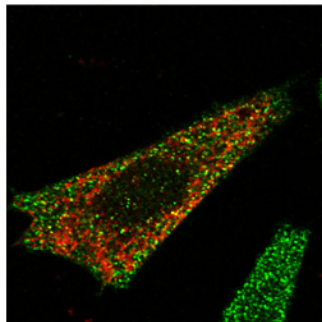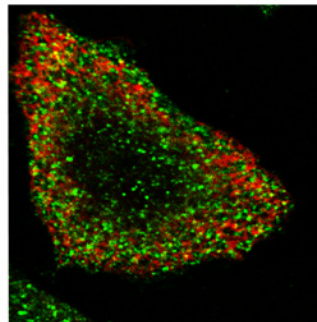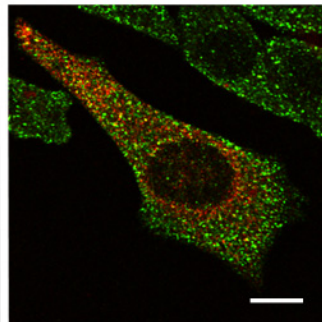

Supplement: NIHMS782-supplement-supp_material2.pdf [file NIHMS782-supplement-supp_material2.pdf]

VAPA-WT

VAPA-P56S

VAPB-WT

VAPB-P56S

- FFAT

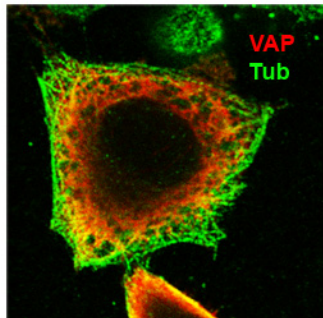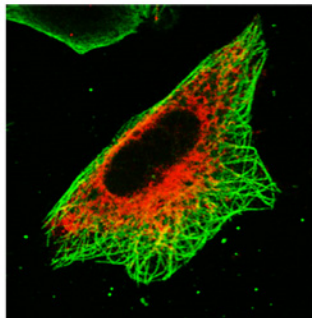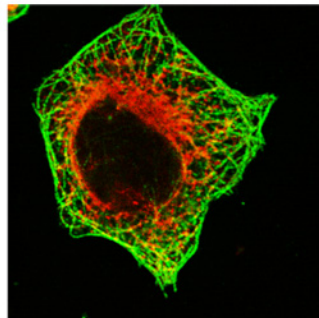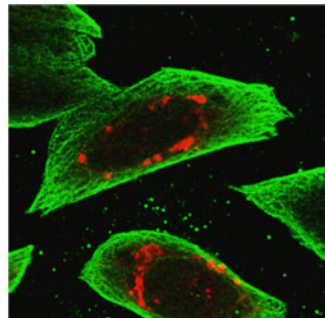

+ FFAT

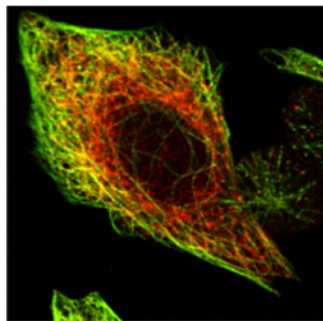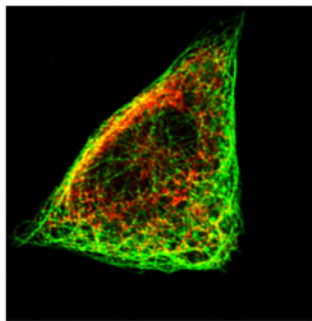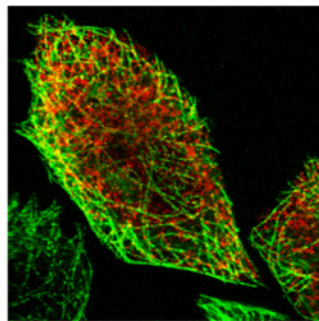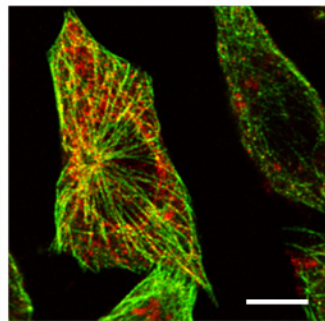

Supplement: NIHMS782-supplement-supp_material3.pdf [file NIHMS782-supplement-supp_material3.pdf]

**A**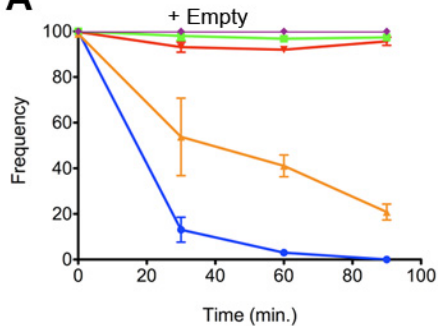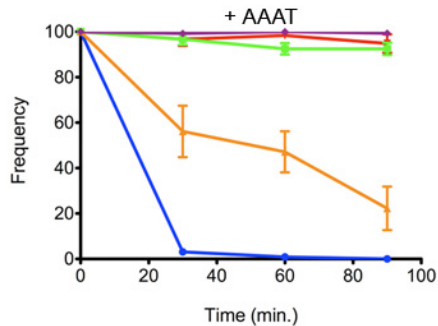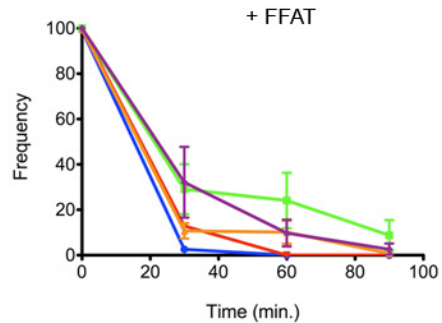**B**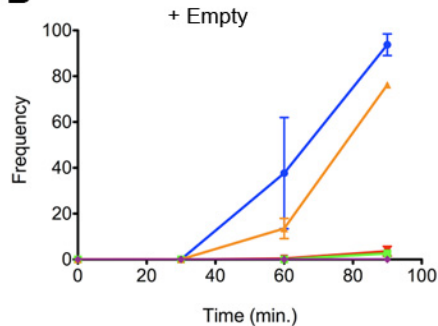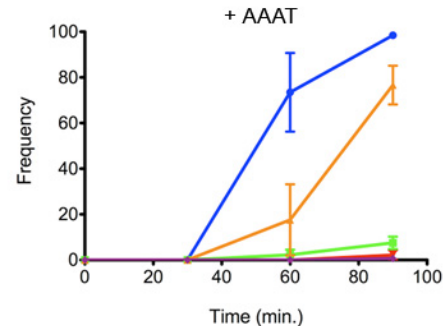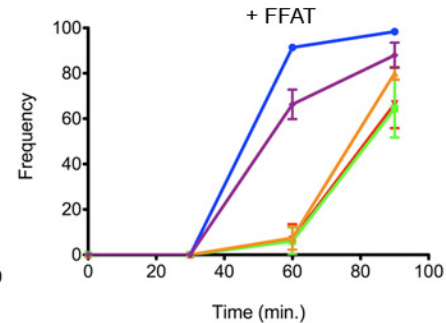

Supplement: NIHMS782-supplement-supp_material4.pdf [file NIHMS782-supplement-supp_material4.pdf]

0 min.

30 min.

Calreticulin

CgB

Calreticulin

CgB

Control

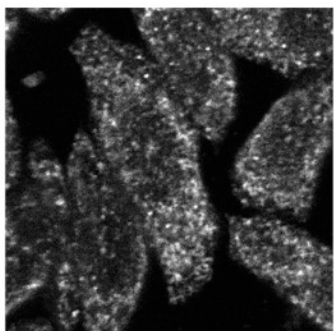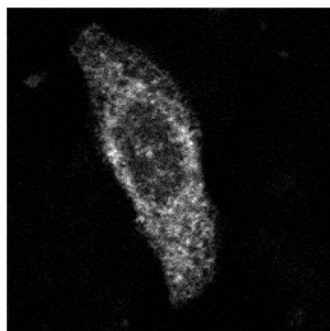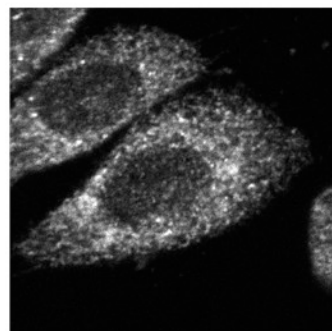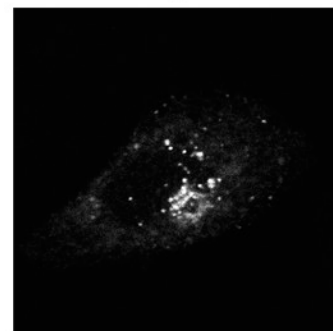

VAPA WT

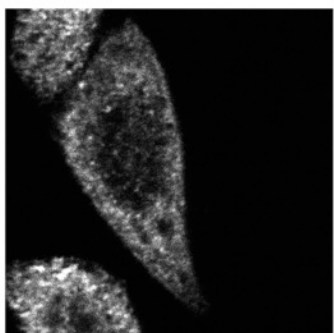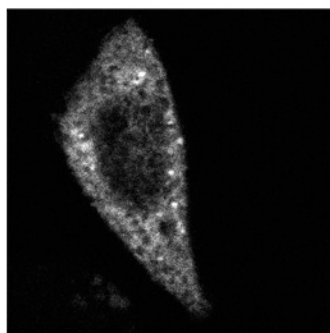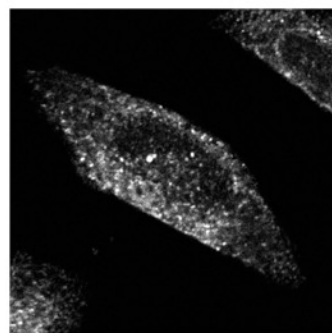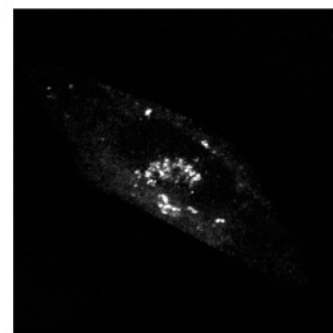

VAPA P56S

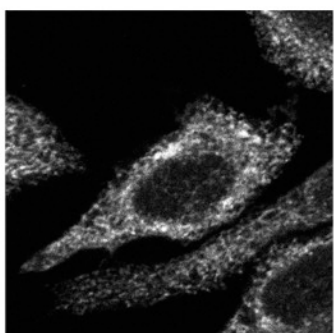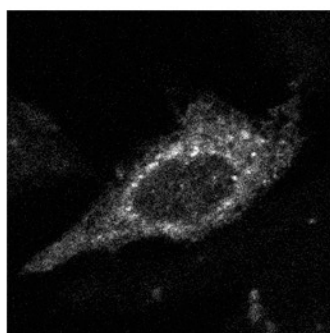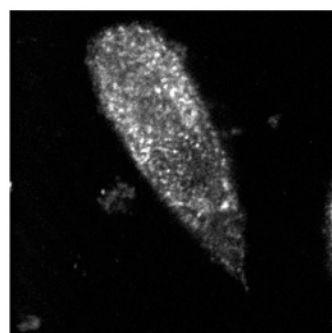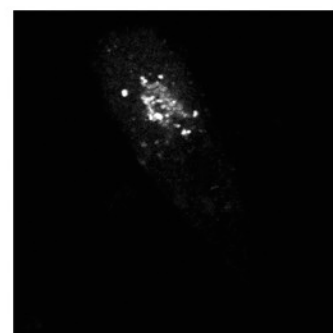

VAPB WT

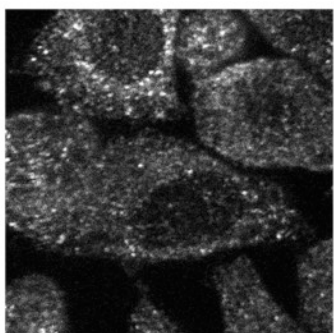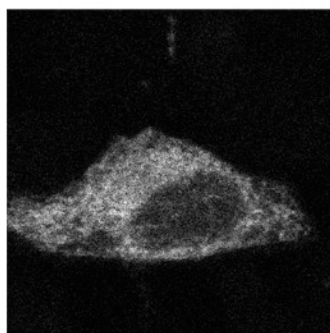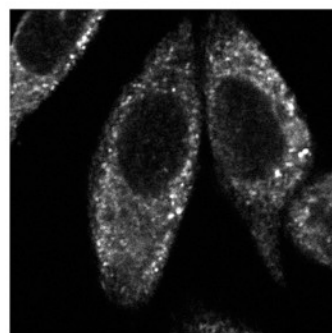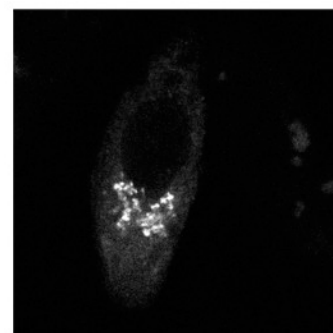

VAPB P56S

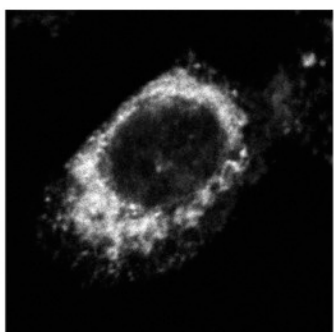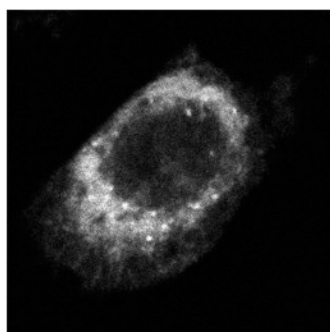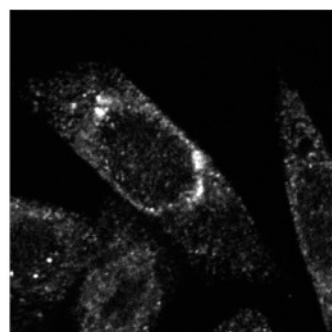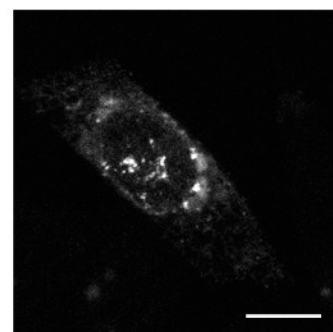

Supplement: NIHMS782-supplement-supp_material5.pdf [file NIHMS782-supplement-supp_material5.pdf]
